# Supplementary material for: Heteroannulations of cyanoacetamide-based MCR scaffolds utilizing formamide
Source: publisher site journal article supplement (doi:10.3762/bjoc.21.13), 2025-01-24

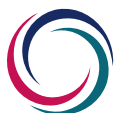

## Supporting Information

for

### Heteroannulations of cyanoacetamide-based MCR scaffolds utilizing formamide

Marios Zingiridis, Danae Papachristodoulou, Despoina Menegaki,  
Konstantinos G. Froudas and Constantinos G. Neochoritis

*Beilstein J. Org. Chem.* **2025**, *21*, 217–225. [doi:10.3762/bjoc.21.13](https://doi.org/10.3762/bjoc.21.13)

## CheckCIF report for 7b

## checkCIF/PLATON report

You have not supplied any structure factors. As a result the full set of tests cannot be run.

THIS REPORT IS FOR GUIDANCE ONLY. IF USED AS PART OF A REVIEW PROCEDURE FOR PUBLICATION, IT SHOULD NOT REPLACE THE EXPERTISE OF AN EXPERIENCED CRYSTALLOGRAPHIC REFEREE.

No syntax errors found.      CIF dictionary      Interpreting this report

### Datablock: cu\_DP\_24\_0m\_a

---

Bond precision:      C-C = 0.0095 Å      Wavelength=1.54178

Cell:                      a=5.3360(1)              b=16.4504(4)              c=21.5018(6)  
                                    alpha=90              beta=94.726(2)              gamma=90

Temperature:              220 K

|                        | Calculated                   | Reported              |
|------------------------|------------------------------|-----------------------|
| Volume                 | 1881.00(8)                   | 1881.00(8)            |
| Space group            | P 21/c                       | P 21/c                |
| Hall group             | -P 2ybc                      | -P 2ybc               |
| Moiety formula         | C14 H15 N3 O, C3 H3 O, C2 H3 | C14 H15 N3 O, C5 H6 O |
| Sum formula            | C19 H21 N3 O2                | C19 H21 N3 O2         |
| Mr                     | 323.39                       | 323.39                |
| Dx, g cm <sup>-3</sup> | 1.142                        | 1.142                 |
| Z                      | 4                            | 4                     |
| Mu (mm <sup>-1</sup> ) | 0.606                        | 0.606                 |
| F000                   | 688.0                        | 688.0                 |
| F000'                  | 690.01                       |                       |
| h, k, lmax             | 5, 18, 23                    | 5, 18, 23             |
| Nref                   | 2694                         | 2688                  |
| Tmin, Tmax             | 0.986, 0.994                 | 0.654, 0.752          |
| Tmin'                  | 0.985                        |                       |

Correction method= # Reported T Limits: Tmin=0.654 Tmax=0.752  
AbsCorr = MULTI-SCAN

Data completeness= 0.998                      Theta(max)= 59.081

R(reflections)= 0.0968( 2019)

wR2(reflections)=  
0.3164( 2688)

S = 1.085

Npar= 218

---

The following ALERTS were generated. Each ALERT has the format

**test-name\_ALERT\_alert-type\_alert-level.**

Click on the hyperlinks for more details of the test.

---

**Alert level B**

THETM01\_ALERT\_3\_B The value of  $\sin(\theta_{\max})/\lambda$  is less than 0.575  
Calculated  $\sin(\theta_{\max})/\lambda = 0.5564$

**Author Response: These were weakly diffracting crystals, especially in higher angles. Although a high-brilliance IuS microfocus with Cu radiation was used reasonable diffraction data could be obtained only to moderate resolution, despite multiple attempts to improve crystal quality.**

---

**Alert level C**

DIFMX02\_ALERT\_1\_C The maximum difference density is  $> 0.1 \times Z_{\max} \times 0.75$   
The relevant atom site should be identified.

|                   |                                                    |              |
|-------------------|----------------------------------------------------|--------------|
| PLAT042_ALERT_1_C | Calc. and Reported MoietyFormula Strings Differ    | Please Check |
|                   | Calc: C14 H15 N3 O, C3 H3 O, C2 H3                 |              |
|                   | Rep.: C14 H15 N3 O, C5 H6 O                        |              |
| PLAT084_ALERT_3_C | High $wR_2$ Value (i.e. $> 0.25$ )                 | 0.32 Report  |
| PLAT094_ALERT_2_C | Ratio of Maximum / Minimum Residual Density        | 2.15 Report  |
| PLAT097_ALERT_2_C | Large Reported Max. (Positive) Residual Density    | 0.71 eA-3    |
| PLAT230_ALERT_2_C | Hirshfeld Test Diff for C00E --C00J                | 5.4 s.u.     |
| PLAT234_ALERT_4_C | Large Hirshfeld Difference C00K --C00L             | 0.16 Ang.    |
| PLAT244_ALERT_4_C | Low 'Solvent' Ueq as Compared to Neighbors of C00C | Check        |
| PLAT260_ALERT_2_C | Large Average Ueq of Residue Including O002        | 0.122 Check  |
| PLAT260_ALERT_2_C | Large Average Ueq of Residue Including C00N        | 0.252 Check  |
| PLAT340_ALERT_3_C | Low Bond Precision on C-C Bonds                    | 0.00947 Ang. |

---

**Alert level G**

|                   |                                                 |              |
|-------------------|-------------------------------------------------|--------------|
| PLAT007_ALERT_5_G | Number of Unrefined Donor-H Atoms               | 1 Report     |
|                   | H001                                            |              |
| PLAT012_ALERT_1_G | N.O.K. _shelx_res_checksum Found in CIF         | Please Check |
| PLAT344_ALERT_2_G | Unusual sp? Angle Range in Solvent/Ion for C00M | Check        |
| PLAT344_ALERT_2_G | Unusual sp? Angle Range in Solvent/Ion for C000 | Check        |
| PLAT367_ALERT_2_G | Long? C(sp?)-C(sp?) Bond C00C - C00M            | 1.60 Ang.    |
| PLAT367_ALERT_2_G | Long? C(sp?)-C(sp?) Bond C00N - C000            | 1.55 Ang.    |
| PLAT432_ALERT_2_G | Short Inter X...Y Contact O001 ..C00C           | 2.86 Ang.    |
|                   | x,y,z =                                         | 1_555 Check  |
| PLAT432_ALERT_2_G | Short Inter X...Y Contact C00C ..C000           | 2.74 Ang.    |
|                   | x,y,z =                                         | 1_555 Check  |
| PLAT432_ALERT_2_G | Short Inter X...Y Contact C00M ..C000           | 1.77 Ang.    |
|                   | x,y,z =                                         | 1_555 Check  |
| PLAT720_ALERT_4_G | Number of Unusual/Non-Standard Labels           | 45 Note      |
|                   | O001 O002 N001 H001 N002 N003 C00A H00A         |              |
|                   | C00B C00C H00C C00D H00D C00E H00B H00E         |              |
|                   | C00F H00F C00G H00G C00H H00H C00I H00I         |              |
|                   | C00J H00J H00K C00K H00L H00M H00N C00L         |              |
|                   | H00O H00P C00M H00Q C00N H00R H00S C00O         |              |

```
          H00T    C005    C006    C008    C009
PLAT773_ALERT_2_G Check long C-C Bond in CIF: C00M    --C000    1.76 Ang.
PLAT790_ALERT_4_G Centre of Gravity not Within Unit Cell: Resd. #    3 Note
          C2 H3
PLAT883_ALERT_1_G No Info/Value for _atom_sites_solution_primary .    Please Do !
```

---

0 **ALERT level A** = Most likely a serious problem - resolve or explain  
1 **ALERT level B** = A potentially serious problem, consider carefully  
11 **ALERT level C** = Check. Ensure it is not caused by an omission or oversight  
13 **ALERT level G** = General information/check it is not something unexpected

4 ALERT type 1 CIF construction/syntax error, inconsistent or missing data  
13 ALERT type 2 Indicator that the structure model may be wrong or deficient  
3 ALERT type 3 Indicator that the structure quality may be low  
4 ALERT type 4 Improvement, methodology, query or suggestion  
1 ALERT type 5 Informative message, check

---

It is advisable to attempt to resolve as many as possible of the alerts in all categories. Often the minor alerts point to easily fixed oversights, errors and omissions in your CIF or refinement strategy, so attention to these fine details can be worthwhile. In order to resolve some of the more serious problems it may be necessary to carry out additional measurements or structure refinements. However, the purpose of your study may justify the reported deviations and the more serious of these should normally be commented upon in the discussion or experimental section of a paper or in the "special\_details" fields of the CIF. checkCIF was carefully designed to identify outliers and unusual parameters, but every test has its limitations and alerts that are not important in a particular case may appear. Conversely, the absence of alerts does not guarantee there are no aspects of the results needing attention. It is up to the individual to critically assess their own results and, if necessary, seek expert advice.

### **Publication of your CIF in IUCr journals**

A basic structural check has been run on your CIF. These basic checks will be run on all CIFs submitted for publication in IUCr journals (*Acta Crystallographica*, *Journal of Applied Crystallography*, *Journal of Synchrotron Radiation*); however, if you intend to submit to *Acta Crystallographica Section C* or *E* or *IUCrData*, you should make sure that full publication checks are run on the final version of your CIF prior to submission.

### **Publication of your CIF in other journals**

Please refer to the *Notes for Authors* of the relevant journal for any special instructions relating to CIF submission.

---

**PLATON version of 15/07/2024; check.def file version of 15/07/2024**

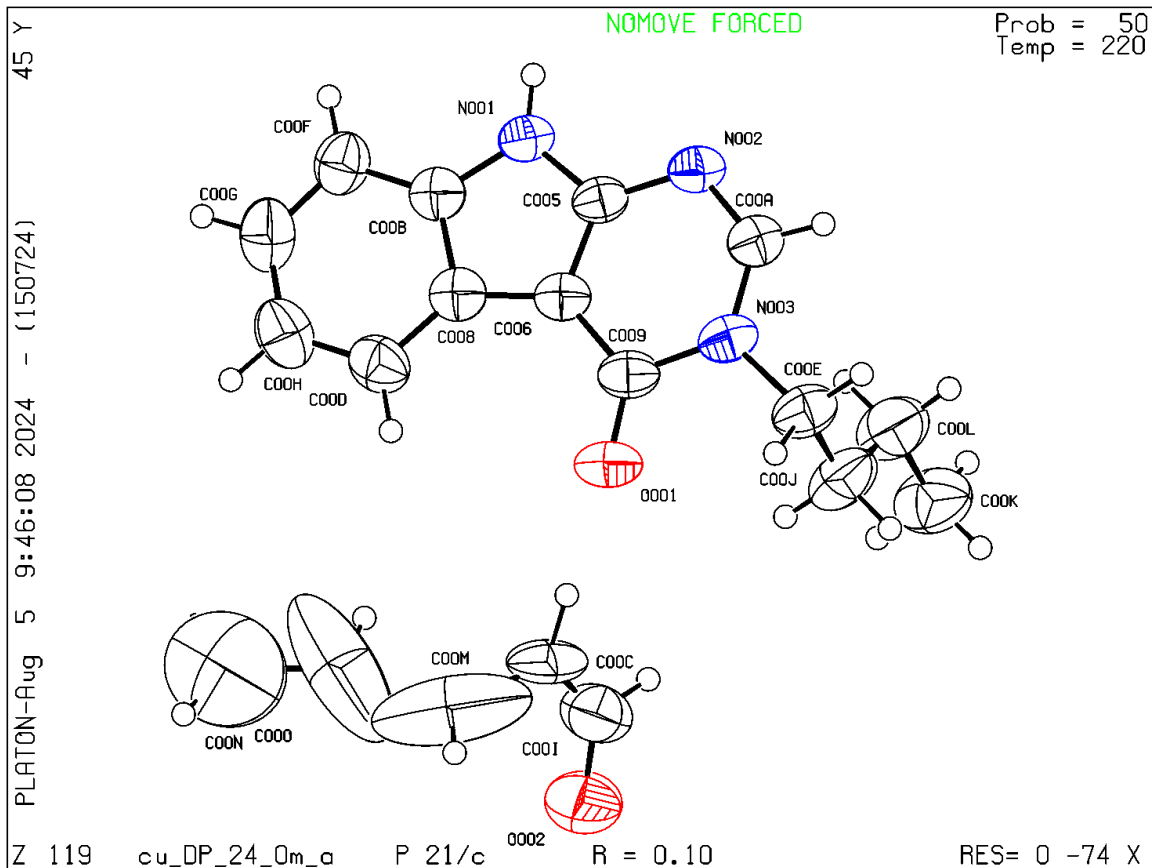

Supplement: Additional file 2 [file 1860-5397-21-13-S2.pdf]
